# Supplementary material
Source: PubMed Central journal article supplement (PMC5345555)
Supplement: JSLHR-59-1087-s001.pdf [file JSLHR-59-1087-s001.pdf]

**Supplemental Table 1.** Participant profiles of proportion of time spent in supported joint engagement, coordinated joint engagement, and weighted joint engagement composite scores.

| <b>Participant</b> | <b>Proportion supported joint engagement</b> | <b>Proportion coordinated joint engagement</b> | <b>Weighted joint engagement composite</b> |
|--------------------|----------------------------------------------|------------------------------------------------|--------------------------------------------|
| 1                  | .52                                          | .48                                            | 1.48                                       |
| 2                  | .90                                          | .10                                            | 1.10                                       |
| 3                  | .65                                          | .26                                            | 1.17                                       |
| 4                  | .82                                          | .13                                            | 1.08                                       |
| 5                  | 1.00                                         | .00                                            | 1.00                                       |
| 6                  | 1.00                                         | .00                                            | 1.00                                       |
| 7                  | .90                                          | .00                                            | 0.90                                       |
| 8                  | 1.00                                         | .00                                            | 1.00                                       |
| 9                  | .86                                          | .00                                            | 0.86                                       |
| 10                 | 1.00                                         | .00                                            | 1.00                                       |
| 11                 | .00                                          | .87                                            | 1.75                                       |
| 12                 | .58                                          | .13                                            | 0.84                                       |
| 13                 | 1.00                                         | .00                                            | 1.00                                       |
| 14                 | .93                                          | .00                                            | 0.93                                       |
| 15                 | .93                                          | .00                                            | 0.93                                       |
| 16                 | .93                                          | .00                                            | 0.93                                       |
| 17                 | .00                                          | .00                                            | 0.00                                       |
| 18                 | .52                                          | .48                                            | 1.48                                       |
| 19                 | .41                                          | .00                                            | 0.41                                       |
| 20                 | .91                                          | .09                                            | 1.09                                       |
| 21                 | 1.00                                         | .00                                            | 1.00                                       |
| 22                 | .79                                          | .21                                            | 1.21                                       |
| 23                 | 1.00                                         | .00                                            | 1.00                                       |
| 24                 | 1.00                                         | .00                                            | 1.00                                       |
| 25                 | .00                                          | 1.00                                           | 2.00                                       |
| 26                 | .77                                          | .15                                            | 1.07                                       |
| 27                 | .83                                          | .17                                            | 1.17                                       |
| 28                 | .95                                          | .00                                            | 0.95                                       |
