# Supplementary material
Source: PubMed Central journal article supplement (PMC5345555)
Supplement: JSLHR-59-1087-s003.pdf [file JSLHR-59-1087-s003.pdf]

**Supplemental Table 3.** Relationship between weighted joint engagement and language abilities in the child period controlling for chronological age in the toddler period ( $N = 28$ ).

|                              | 1 | 2     | 3      | 4      | 5      | 6      |
|------------------------------|---|-------|--------|--------|--------|--------|
| 1. Weighted Joint Engagement | — | .49** | .51**  | .42*   | .49**  | .39*   |
| 2. MSEL Receptive Language   |   | —     | .88*** | .78*** | .88*** | .81*** |
| 3. MSEL Expressive Language  |   |       | —      | .77*** | .95*** | .82*** |
| 4. VABS Receptive Language   |   |       |        | —      | .80*** | .67*** |
| 5. VABS Expressive Language  |   |       |        |        | —      | .82*** |
| 6. Rate of Different Words   |   |       |        |        |        | —      |

*Note.* MSEL = Mullen Scales of Early Learning (Mullen, 1995); VABS = Vineland Adaptive Behavior Scales (Sparrow, Balla, & Cicchetti, 1984; Sparrow, Cicchetti, & Balla, 2005).

\* $p < .05$ . \*\* $p < .01$ . \*\*\* $p < .001$ .

### References

- Mullen, E. (1995). *Mullen Scales of Early Learning*. Circle Pines, MN: AGS.
- Sparrow, S. S., Balla, D. A., & Cicchetti, D. (1984). *Vineland Adaptive Behavior Scales*. Circle Pines, MN: AGS.
- Sparrow, S. S., Cicchetti, D., & Balla, D. A. (2005). *Vineland-II: Vineland Adaptive Behavior Scales—Second Edition*. Minneapolis, MN: Pearson.
